# Supplementary material for: A Novel Gene Signature-Based Model Predicts Biochemical Recurrence-Free Survival in Prostate Cancer Patients after Radical Prostatectomy
Source: PubMed Central journal article supplement (PMC7017310; doi:10.3390/cancers12010001), 2019-12-18
Supplement: cancers-12-00001-s001.pdf [file cancers-12-00001-s001.pdf]

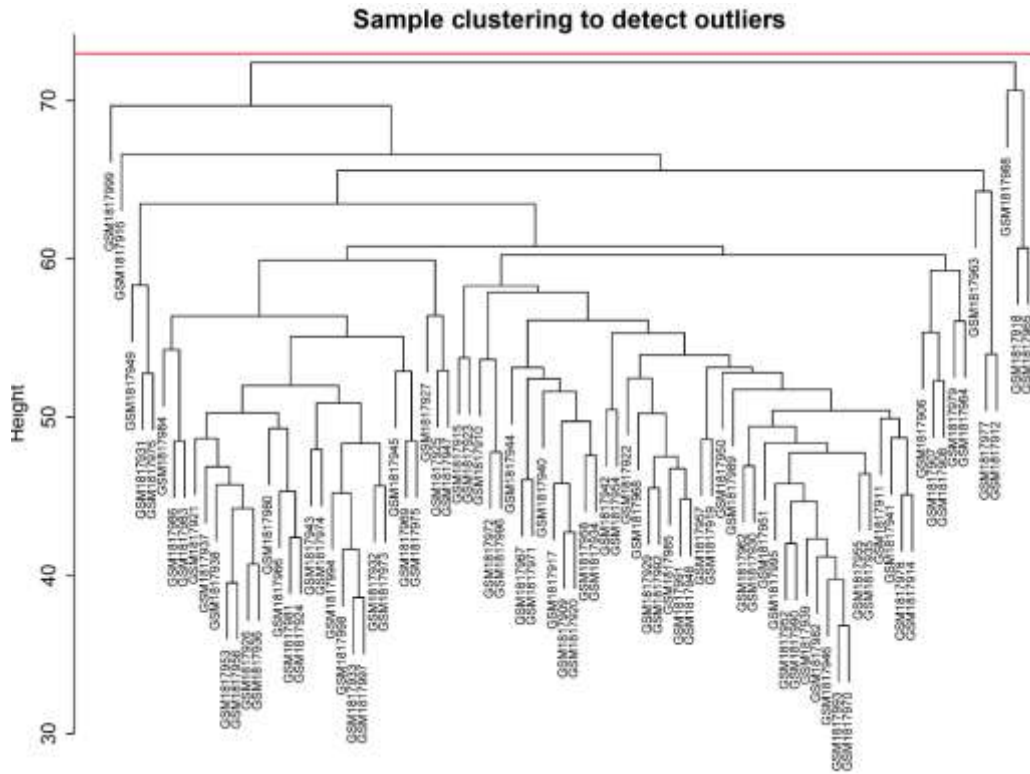

Figure S1. Sample clustering showed no outlier was detected.

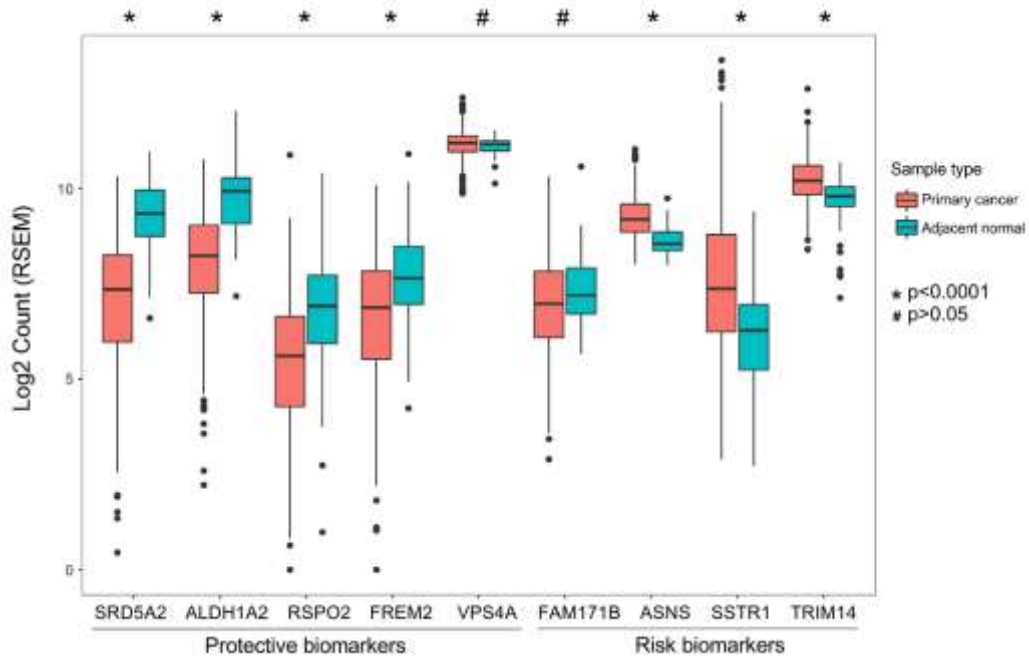

Figure S2. Expression profiles of the gene signature in primary tumor tissues and adjacent normal tissues from TCGA.

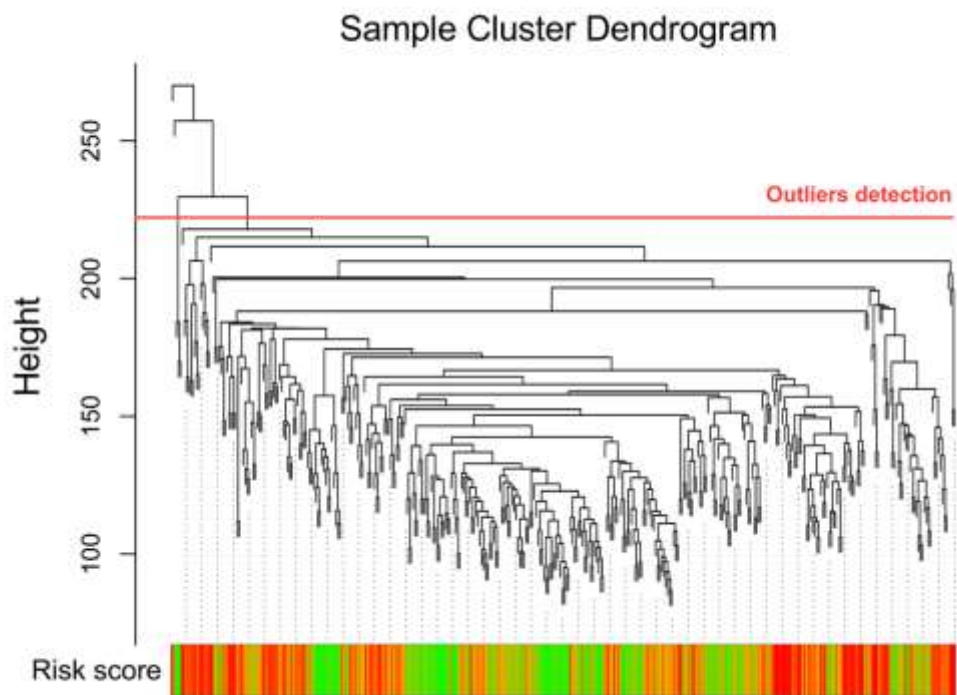

**Figure S3.** Sample clustering was performed to exclude outliers.
